# Supplementary material for: Tuning of the Mg Alloy AZ31 Anodizing Process for Biodegradable Implants
Source: PubMed Central journal article supplement (PMC8041254; doi:10.1021/acsami.0c22933), 2021-03-11
Supplement: am0c22933_si_001.pdf [file am0c22933_si_001.pdf]

# Supporting Information

## Tuning of Mg alloy AZ31 anodizing process for biodegradable implants

*Andrea Zaffora<sup>1</sup>, Francesco Di Franco<sup>1,\*</sup>, Danilo Virtù<sup>1</sup>, Francesco Carfi Pavia<sup>1</sup>, Giulio Gherzi<sup>2</sup>,  
Sannakaisa Virtanen<sup>3</sup>, Monica Santamaria<sup>1</sup>*

<sup>1</sup>Università degli Studi di Palermo, Dipartimento di Ingegneria, Viale delle Scienze, 90128 Palermo,  
Italy

<sup>2</sup>Università degli Studi di Palermo, Dipartimento di Scienze e Tecnologie Biologiche, Chimiche e  
Farmaceutiche (STEBICEF), Viale delle Scienze, 90128 Palermo, Italy

<sup>3</sup>Chair for Surface Science and Corrosion, Department of Materials Science and Engineering,  
University of Erlangen-Nürnberg, Erlangen 91058, Germany

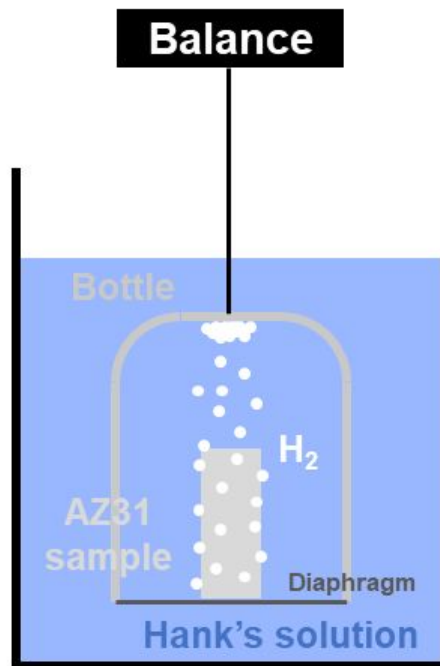

**Figure S1.** Experimental setup for the hydrogen evolution rate measurement.
